# Supplementary material for: Osthole inhibits triple negative breast cancer cells by suppressing STAT3
Source: PubMed Central journal article supplement (PMC6303899; doi:10.1186/s13046-018-0992-z), 2018-12-22
Supplement: 13046_2018_992_MOESM1_ESM.pdf [file 13046_2018_992_MOESM1_ESM.pdf]

## ***Supporting Information***

### **Osthole inhibits triple negative breast cancer cells by suppressing STAT3**

Xuanxuan Dai<sup>1,2,#</sup>, Changtian Yin<sup>1,2,#</sup>, Yi Zhang<sup>3</sup>, Guilong Guo<sup>2</sup>, Chengguang Zhao<sup>1</sup>, Ouchen Wang<sup>1</sup>, Youqun Xiang<sup>2</sup>, Xiaohua Zhang<sup>2,\*</sup>, Guang Liang<sup>1,\*</sup>

<sup>1</sup> Chemical Biology Research Center, School of Pharmaceutical Sciences, Wenzhou Medical University, Wenzhou, Zhejiang 325035, China

<sup>2</sup> Department of Surgical Oncology, the First Affiliated Hospital of Wenzhou Medical University, Wenzhou, Zhejiang 325035, China

<sup>3</sup> Department of dermatology, the First Affiliated Hospital of Wenzhou Medical University, Wenzhou, Zhejiang 325035, China

**Running title:** Osthole inhibits TNBCs by targeting STAT3

# These authors contribute equally to this work.

#### **\*Corresponding authors:**

Guang Liang, Ph.D, Professor  
Chemical Biology Research Center, School of Pharmaceutical Sciences, Wenzhou Medical University, Wenzhou 325035, China  
Tel: +86-577-86699892; Fax: +86-577-86689982;  
E-mail: wzmclianguang@163.com

Xiaohua Zhang,  
Department of surgical Oncology, The First Affiliated Hospital of Wenzhou Medical University, Wenzhou, Zhejiang 325035, China  
E-mail: xiaohuazhang2015@sina.com

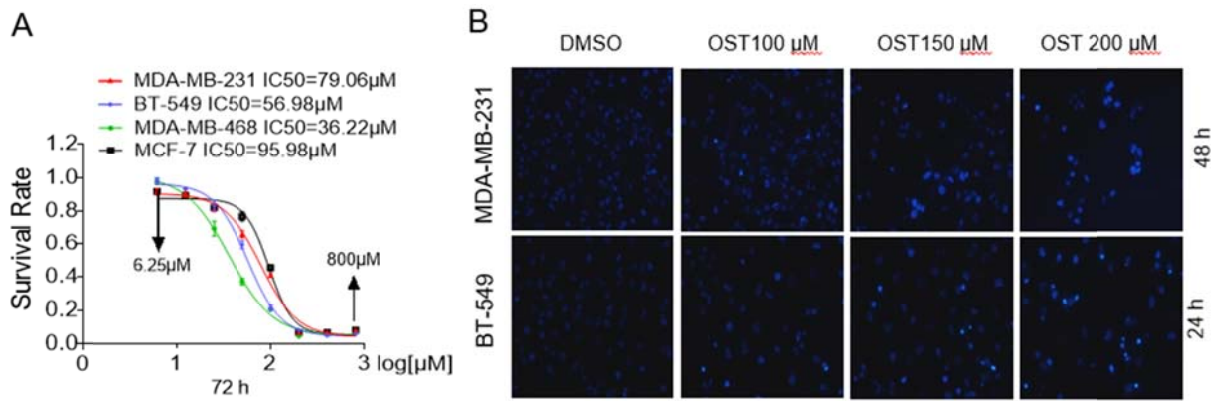

**Supplementary Figure S1: Nuclear morphology following osthole exposure in TNBC cells.** (A) The effects of osthole on the viability of human TNBC cells. MDA-MB-231, BT-549, MDA-MB-468, and MCF-7 cells were challenged with increasing concentrations of osthole. Cell viability was determined by MTT assay and the IC<sub>50</sub> values at 72h were calculated. (B) MDA-MB-231 and BT-549 cells were treated with increasing concentrations of osthole for 48 h or 24 h, respectively. Cells were then stained with Hoechst 33258 to assess apoptosis-related nuclear morphology.

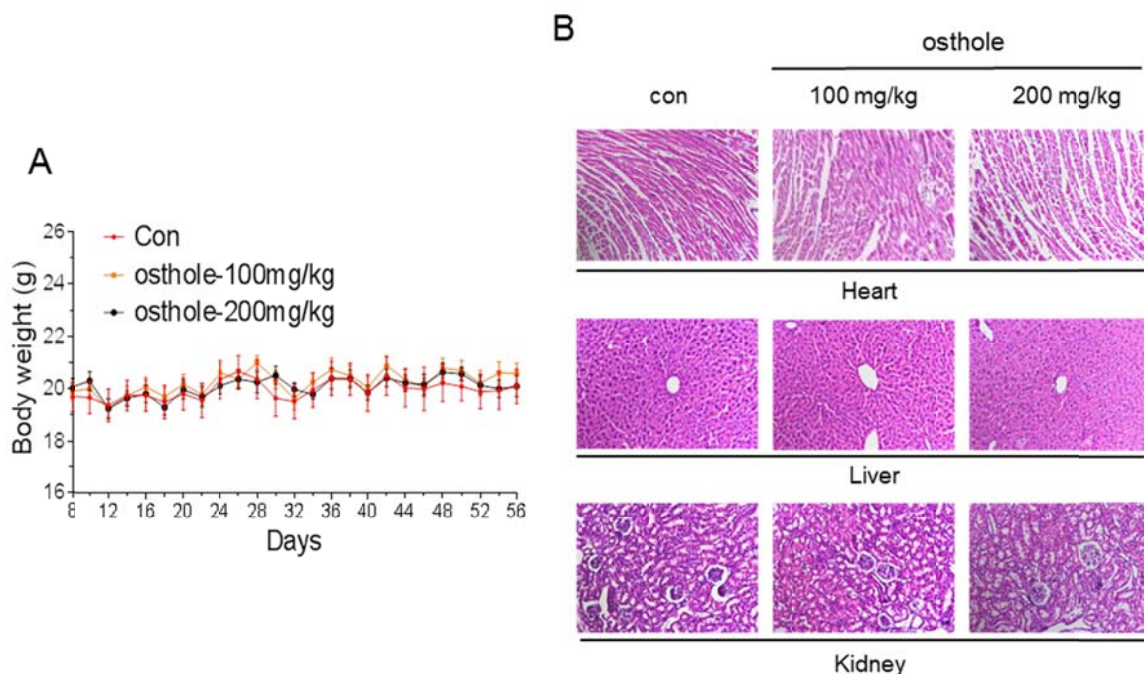

**Supplementary Figure S2: Effects of osthole on body weights and tissue structure**

(A) Body weights of the mice in vehicle- and osthole-treatment groups. (B) H&E staining of heart, liver, and kidney specimens from mice harboring MDA-MB-231 tumors.
